# Supplementary material for: Stretchy and strong polyurethane–urea supramolecular (PUUS) hydrogels with various stimulus-responsive behaviours: the effect of chain-extenders
Source: Royal Society of Chemistry journal article supplement (doi:10.1039/c8tb02585a), 2018-11-15
Supplement: c8tb02585a1.pdf [file c8tb02585a1.pdf]

## Stretchy and strong polyurethane–urea supramolecular (PUUS) hydrogels with various stimuli-responsive behaviours: the effect of chain-extender

Qianhui Xia,<sup>a</sup> Lianmin Chen,<sup>a</sup> Ye Zhu,<sup>b</sup> Zengwu Shao,<sup>c</sup> Mingyu Guo<sup>\*a</sup>

<sup>a</sup>College of Chemistry, Chemical Engineering and Materials Science, Soochow University, Suzhou 215123, China;

<sup>b</sup>The Key Laboratory of Synthetic and Biological Colloids, Ministry of Education, Jiangnan University, Wuxi 214122, China;

<sup>c</sup>Department of Orthopaedic Surgery Union Hospital, Tongji Medical College, Huazhong University of Science and Technology, Wuhan 430022, China.

E-mail: guomingyu@suda.edu.cn

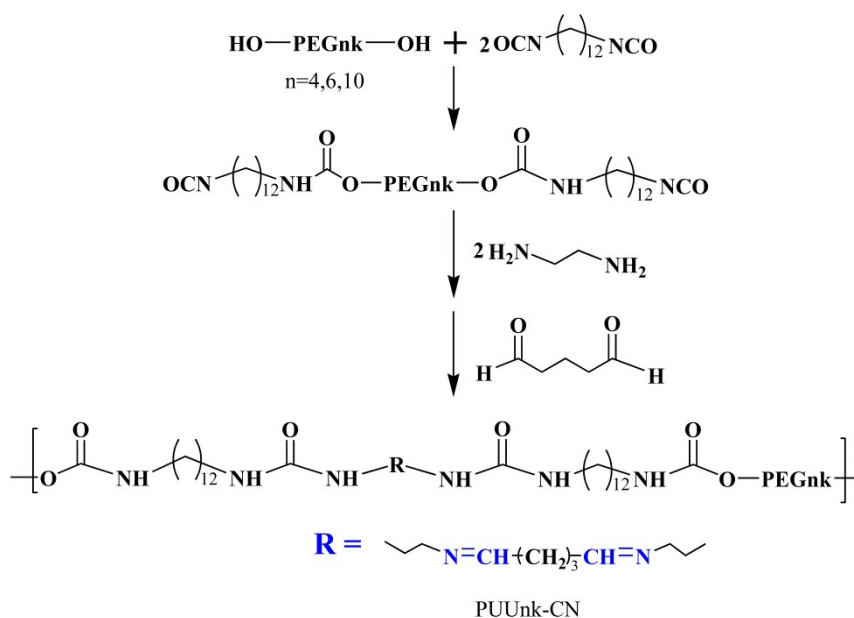

**Scheme S1.** Synthetic procedure of the PUUnk-CN copolymers.

**Table S1.** The weight average molecular weight ( $M_w$ ) and polydistribution index (PDI) of PUUnk-R copolymers

|                  |          |           |           |            |          |
|------------------|----------|-----------|-----------|------------|----------|
|                  | PUU4k-CH | PUU4k-Py  | PUU4k-SS  | PUU4k-Azo  | PUU4k-CN |
| $M_w$<br>(g/mol) | 170,000  | 312,000   | 275,000   | 293,000    | 435,000  |
| PDI              | 1.8      | 2.7       | 2.3       | 2.5        | 2.8      |
|                  |          | PUU6k-Py  | PUU6k-SS  | PUU6k-Azo  | PUU6k-CN |
| $M_w$<br>(g/mol) |          | 294000    | 370000    | 480000     | 480000   |
| PDI              |          | 1.9       | 2.2       | 3.6        | 2.3      |
|                  |          | PUU10k-Py | PUU10k-SS | PUU10k-Azo | PUU6k-CN |
| $M_w$<br>(g/mol) |          | 451000    | 460000    | 950000     | 580000   |
| PDI              |          | 2.1       | 2.8       | 3.3        | 2.4      |

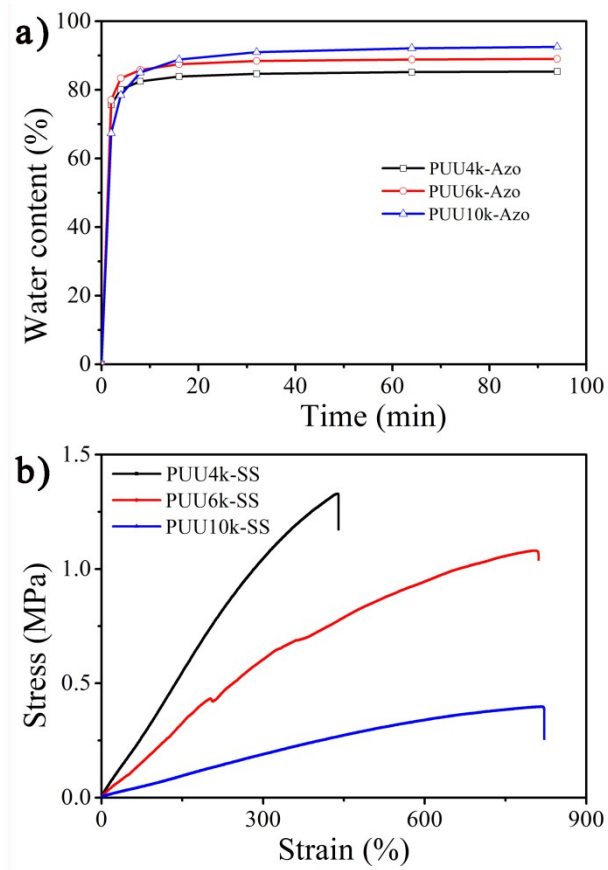

**Fig S1.** a) Time dependent water swelling ratio curves of the PUUnk-Azo dry films and b) tensile testing curves of the equilibrium swollen PUUnk-SS based PUUS hydrogels.
